# Supplementary material for: Se-O Bond Is Unique to High Se Enriched Sweet Potato Stem Protein with Better Antioxidant Ability
Source: MDPI journal article supplement (doi:10.3390/foods10123064), 2021-12-09
Supplement: s1 [file s1]

## Supplementary Data (Foods)

Se-O bond is unique to high Se enriched sweet potato stem protein with better antioxidant ability

Qi Gao, Jia-Le Wu, Lan-Ping Jiang, Su-Qi Sun, Xue-Jun Gu, Mei Tie, Masaru Tanokura, You-Lin

Xue

### Contents:

**Supplementary Figure S1.** SEM-EDS of the SSP samples: (A) SSP, (B) low-Se SSP and (C) high-Se SSP.

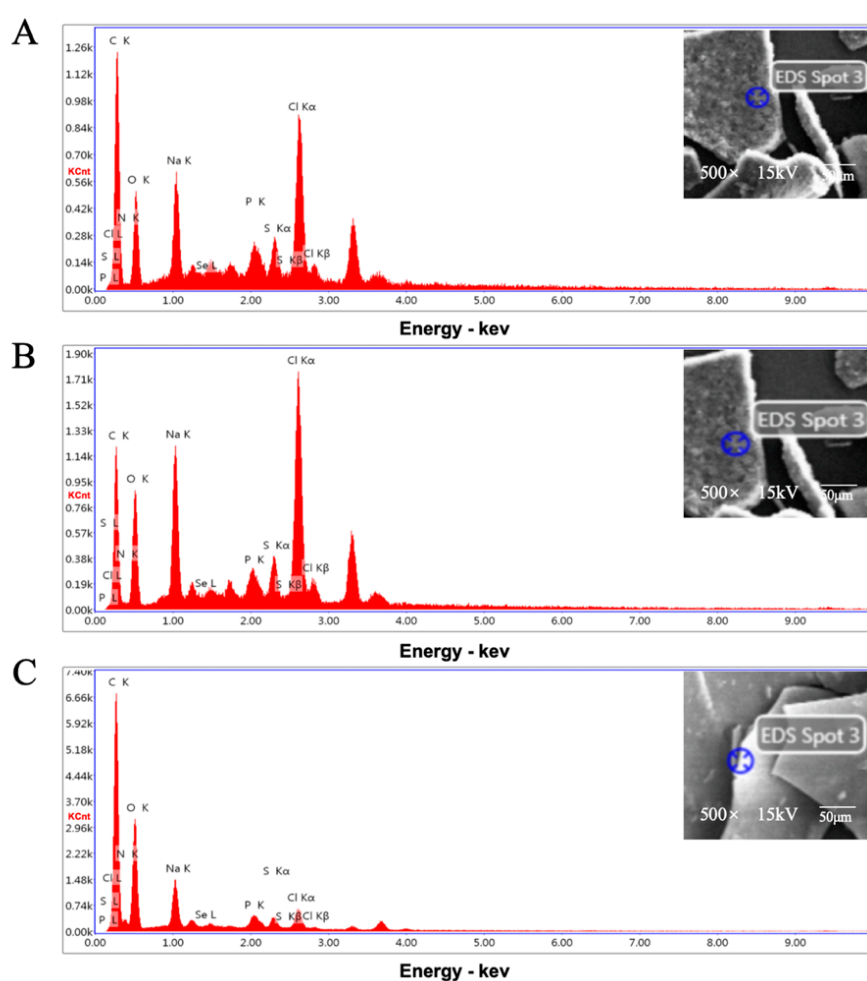

**Figure S1.** Gao *et al.*
